# Supplementary material for: Can the Executive Control Network be Used to Diagnose Parkinson's Disease and as an Efficacy Indicator of Deep Brain Stimulation?
Source: Parkinsons Dis. 2020 Feb 14;2020:6348102. doi: 10.1155/2020/6348102 (PMC7042555; doi:10.1155/2020/6348102)
Supplement: Supplementary Materials — The final supplementary materials file records the clinical measures of patients with PD and controls, including the participants' gender, age, and clinical scale scores. . [file 6348102.f1.xlsx]

## Sheet: Sheet1
姓名	性别	年龄	教育程度	MMSE	MoCa	HAMA	HAMD	组别		Gender	age
吴瑞春	男	78	小学	26	27	1	2	1		M	78
尚春兰	女	65	初中	29	28	0	1	1		F	65
朱志琴	女	60	初中	28	29	0	0	1		F	60
汤金龙	男	66	初中	30	30	0	1	1		M	66
牛玉金	男	74	小学	25	27	1	2	1		M	74
陈爱弟	女	65	初中	27	28	1	0	1		F	65
张文忠	男	49	高中	30	29	1	0	1		M	49
葛秀梅	女	45	初中	30	30	0	0	1		F	45
刘红	女	51	初中	29	28	0	1	1		F	51
曹仲贤	男	69	初中	26	29	1	2	1		M	69
张建华	男	74	小学	25	28	1	2	1		M	74
徐广萍	女	62	初中	27	30	0	0	1		F	62
张松存	男	60	初中	30	30	0	0	1		M	60
蒋荷荣	女	68	小学	28	29	0	0	1		F	68

## Sheet: Sheet2
姓名	PDQ39	UDPRS3	MMSE	CoCA	HAMA	HAMD		Gender	age	PDQ39	UDPRS3	MMSE	MoCA	HAMA	HAMD		Gender	age	MMSE	MoCa	HAMA	HAMD
PD001	40	32	28	25	4	10	PD001	F	61	40	32	28	25	4	10	CN001	M	78	26	27	1	2
PD002	51	44	22	21	7	3	PD002	M	72	51	44	22	21	7	3	CN002	F	65	29	28	0	1
PD003	20	28	29	25	5	7	PD003	M	55	20	28	29	25	5	7	CN003	F	60	28	29	0	0
PD004	39	73	28	28	3	5	PD004	M	48	39	73	28	28	3	5	CN004	M	66	30	30	0	1
PD005	43	56	27	28	6	5	PD005	F	60	43	56	27	28	6	5	CN005	M	74	25	27	1	2
PD006	42	34	24	26	3	2	PD006	M	70	42	34	24	26	3	2	CN006	F	65	27	28	1	0
PD007	64	52	25	22	8	6	PD007	F	67	64	52	25	22	8	6	CN007	M	49	30	29	1	0
PD008	46	32	25	28	4	7	PD008	M	57	46	32	25	28	4	7	CN008	F	45	30	30	0	0
PD009	13	32	23	23	2	1	PD009	F	72	13	32	23	23	2	1	CN009	F	51	29	28	0	1
PD010	17	36	27	24	14	16	PD010	F	65	17	36	27	24	14	16	CN010	M	69	26	29	1	2
PD011	39	25	30	27	10	9	PD011	F	40	39	25	30	27	10	9	CN011	M	74	25	28	1	2
PD012	88	45	30	26	1	0	PD012	F	64	88	45	30	26	1	0	CN012	F	62	27	30	0	0
PD013	26	34	29	24	3	0	PD013	M	68	26	34	29	24	3	0	CN013	M	60	30	30	0	0
PD014	45	35	24	26	1	5	PD014	F	67	45	35	24	26	1	5	CN014	F	68	28	29	0	0
PD015	44	49	30	23	4	2	PD015	M	68	44	49	30	23	4	2
PD016	54	27	26	26	0	1	PD016	M	77	54	27	26	26	0	1
PD017	47	42	27	25	2	1	PD017	F	68	47	42	27	25	2	1
PD018	65	57	25	27	11	8	PD018	F	61	65	57	25	27	11	8
PD019	38	32	28	29	3	3	PD019	F	56	38	32	28	29	3	3
PD020	53	56	26	24	2	4	PD020	M	63	53	56	26	24	2	4
PD021	51	26	27	22	9	10	PD021	F	73	51	26	27	22	9	10
PD022	21	34	28	24	11	12	PD022	F	69	21	34	28	24	11	12
PD023	68	23	23	20	2	4	PD023	F	69	68	23	23	20	2	4
	44.087	39.3043	26.5652	24.913	5	5.26087
	17.2851	12.4706	2.31866	2.33895	3.73002	4.05631

## Sheet: Sheet3
姓名	MMSE	MoCa	HAMA	HAMD	组别
吴瑞春	26	27	1	2	1
尚春兰	29	28	0	1	1
朱志琴	28	29	0	0	1
汤金龙	30	30	0	1	1
牛玉金	25	27	1	2	1
陈爱弟	27	28	1	0	1
张文忠	30	29	1	0	1
葛秀梅	30	30	0	0	1
刘红	29	28	0	1	1
曹仲贤	26	29	1	2	1
张建华	25	28	1	2	1
徐广萍	27	30	0	0	1
张松存	30	30	0	0	1
蒋荷荣	28	29	0	0	1
PD001	28	25	4	10	2
PD002	22	21	7	3	2
PD003	29	25	5	7	2
PD004	28	28	3	5	2
PD005	27	28	6	5	2
PD006	24	26	3	2	2
PD007	25	22	8	6	2
PD008	25	28	4	7	2
PD009	23	23	2	1	2
PD010	27	24	14	16	2
PD011	30	27	10	9	2
PD012	30	26	1	0	2
PD013	29	24	3	0	2
PD014	24	26	1	5	2
PD015	30	23	4	2	2
PD016	26	26	0	1	2
PD017	27	25	2	1	2
PD018	25	27	11	8	2
PD019	28	29	3	3	2
PD020	26	24	2	4	2
PD021	27	22	9	10	2
PD022	28	24	11	12	2
PD023	23	20	2	4	2
